# Supplementary material
Source: Springer Nature journal article supplement (https://www.springermedizin.de/resource/supplementary/12888_2012_1070_MOESM1_ESM.pdf/9479718)
Supplement: MOESM1 [file 9479718]

127 assessed for eligibility

47 did not take part  
15 not meeting inclusion  
criteria  
5 met exclusion criteria  
27 refused to participate

80 randomly allocated

40 allocated to Group 1

40 were screened with SAPAS-AV  
by staff at baseline

40 were assessed with reference  
standard by researcher at baseline

40 allocated to Group 2

40 were screened with SAPAS-AV  
by researcher at baseline

40 were assessed with reference  
standard by researcher at baseline

At 9-days follow-up

40 were assessed with SAPAS-AV  
by researcher

At 9-days follow-up

40 were assessed with SAPAS-AV  
by researcher

80 analysed
